# Supplementary material for: Genome-wide assessment of population structure and genetic diversity of Chinese Lou onion using specific length amplified fragment (SLAF) sequencing
Source: PLoS One. 2020 May 5;15(5):e0231753. doi: 10.1371/journal.pone.0231753 (PMC7199963; doi:10.1371/journal.pone.0231753)
Supplement: S2 Table — (XLSX) [file pone.0231753.s002.xlsx]

## Sheet: Sheet1
Table S2. Quality control of sequencing data.
Individual ID	Discribtion	ReadSum	BaseSum	GC(%)	Q30(%)	SLAF	Depth	AverDepth	PolySLAF	SNP	Coverage
1-1	Datong,Qinghai	10000003	2000000600	42.06	92.71	294489	7663333	26.0225	65288	214939	0.0136
1-2	Datong,Qinghai	15112297	3022459400	42.61	93.33	437933	8446968	19.2883	56781	246690	0.0202
1-3	Datong,Qinghai	15385148	3077029600	43.17	92.75	401090	7854708	19.5834	50616	216508	0.0185
1-4	Datong,Qinghai	8568907	1713781400	44.09	93.04	463029	9372913	20.2426	60617	263059	0.0213
1-5	Datong,Qinghai	11819982	2363996400	43.32	92.81	451041	7847861	17.3994	58497	260171	0.0208
2-1	Bailang,Tibet	9154607	1830921400	43.95	92.21	455915	7089813	15.5507	60742	273497	0.021
2-2	Bailang,Tibet	12324024	2464804800	41.81	92.53	484240	8430331	17.4094	64286	286940	0.0223
2-3	Bailang,Tibet	16265972	3253194400	43.33	92.72	211856	10973298	51.796	25714	120783	0.0098
2-4	Bailang,Tibet	11838624	2367724800	42.62	93.15	391554	7373737	18.832	1749	13368	0.018
2-5	Bailang,Tibet	10460658	2092131600	42.89	93.63	469370	12074216	25.7243	61549	267059	0.0216
3-1	Linzhi,Tibet	13286111	2657222200	42.9	93.01	280201	5981377	21.3467	63165	204336	0.0129
3-2	Linzhi,Tibet	13566301	2713260200	42.42	92.8	379100	8466470	22.3331	48295	203654	0.0175
3-3	Linzhi,Tibet	7593225	1518645000	42.31	93.54	387756	7439223	19.1853	47473	194877	0.0179
3-4	Linzhi,Tibet	13927778	2785555600	42.49	92.83	457589	8106989	17.7167	59151	252089	0.0211
3-5	Linzhi,Tibet	10937873	2187574600	44	93.11	445919	8111607	18.1908	57020	242843	0.0205
4-1	Baode,Shanxi	14008403	2801680600	43.22	92.59	433087	9757989	22.5312	54323	227912	0.02
4-2	Baode,Shanxi	13618023	2723604600	43.13	92.48	263169	5865730	22.2888	61634	203890	0.0121
4-3	Baode,Shanxi	12854982	2570996400	42.81	92.61	403587	7382528	18.2923	49880	205745	0.0186
4-4	Baode,Shanxi	12703778	2540755600	43.81	92.99	483781	10271174	21.231	61659	261539	0.0223
4-5	Baode,Shanxi	10805314	2161062800	43.42	92.92	467521	10322388	22.079	58658	246041	0.0215
5-1	Hequ,Shanxi	15158686	3031737200	42.75	92.77	431814	9761501	22.6058	54785	229105	0.0199
5-2	Hequ,Shanxi	9859651	1971930200	42.98	92.93	432599	10028900	23.1829	53802	222953	0.0199
5-3	Hequ,Shanxi	9297959	1859591800	41.95	92.2	271107	6858301	25.2974	62316	201499	0.0125
5-4	Hequ,Shanxi	10651504	2130300800	41.87	92.95	413167	8356611	20.2257	52234	220871	0.019
5-5	Hequ,Shanxi	8866501	1773300200	43.53	92.69	421672	8666568	20.5529	52755	223043	0.0194
6-1	Zhongwei,Ningxia	10412106	2082421200	42.48	91.42	380403	6932223	18.2234	50418	222690	0.0175
6-2	Zhongwei,Ningxia	14172559	2834511800	42.59	90.47	434257	10612251	24.4377	55148	235579	0.02
6-3	Zhongwei,Ningxia	15347221	3069444200	41.77	90.41	443366	9455108	21.3257	56489	243125	0.0204
7-1	Jiaxian, Shaanxi	13396079	2679215800	42.04	92.87	433247	10012999	23.1115	54110	226429	0.02
7-2	Jiaxian, Shaanxi	12089322	2417864400	42.04	92.53	477717	10449271	21.8733	61142	258155	0.022
7-3	Jiaxian, Shaanxi	9305703	1861140600	41.51	93.06	398163	6963257	17.4885	49106	204159	0.0183
7-4	Jiaxian, Shaanxi	10469583	2093916600	42.96	92.46	411717	8545724	20.7563	53051	229619	0.019
7-5	Jiaxian, Shaanxi	10408452	2081690400	42.64	92.53	417273	7444656	17.8412	51621	214371	0.0192
8-1	Mizhi,Shaanxi	12347739	2469547800	41.86	92.71	438946	9584336	21.8349	55474	234750	0.0202
8-2	Mizhi,Shaanxi	7912761	1582552200	42.86	92.17	450229	9184917	20.4005	59314	257037	0.0207
8-3	Mizhi,Shaanxi	9514287	1902857400	41.83	92.13	443430	8646419	19.4989	58329	252214	0.0204
8-4	Mizhi,Shaanxi	13549946	2709989200	42.16	91.71	273068	4472287	16.3779	60336	198962	0.0126
8-5	Mizhi,Shaanxi	10954409	2190881800	42.78	92.45	387565	6485010	16.7327	53959	243439	0.0179
9-1	Yanchi,Ningxia	13107306	2621461200	42.37	92.69	453924	9470400	20.8634	61215	268804	0.0209
9-2	Yanchi,Ningxia	12382347	2476469400	42.07	92.8	486480	11948157	24.5604	62077	263966	0.0224
9-3	Yanchi,Ningxia	12655265	2531053000	41.79	92.7	447700	8461445	18.8998	59721	261899	0.0206
9-4	Yanchi,Ningxia	8809071	1761814200	42.31	93.07	469059	10950766	23.3462	61832	268292	0.0216
9-5	Yanchi,Ningxia	10565718	2113143600	42	92.79	264240	4260688	16.1243	57738	191651	0.0122
10-1	Zhongning,Ningxia	11058427	2211685400	41.91	92.51	412427	7540367	18.2829	55711	245258	0.019
10-2	Zhongning,Ningxia	12600907	2520181400	41.9	92.81	409753	9030038	22.0378	52164	221524	0.0189
10-3	Zhongning,Ningxia	13496159	2699231800	42.24	92.54	439771	8773712	19.9506	56567	241948	0.0203
10-4	Zhongning,Ningxia	8895422	1779084400	42.08	92.35	421568	8448358	20.0403	56770	250074	0.0194
10-5	Zhongning,Ningxia	10815219	2163043800	42.66	92.88	457632	7802326	17.0493	58771	258491	0.0211
11-1	Tongxin-1, Ningxia	9983538	1996707600	42.33	92.59	440950	7201383	16.3315	58078	259863	0.0203
11-2	Tongxin-1, Ningxia	9564589	1912917800	42.07	92.29	468106	8370587	17.8818	60238	264855	0.0216
11-3	Tongxin-1, Ningxia	12163675	2432735000	42.39	92.62	443529	7341756	16.553	56528	249604	0.0204
11-4	Tongxin-1, Ningxia	11856827	2371365400	43.25	92.47	440642	7204552	16.3501	57832	258243	0.0203
11-5	Tongxin-1, Ningxia	11081991	2216398200	43.02	92.77	450001	7132215	15.8493	58316	260627	0.0207
12-1	Hetao, Inner mongolia	6147059	1229411800	44.54	92.86	237317	4021659	16.9464	57230	186379	0.0109
12-2	Hetao, Inner mongolia	8444845	1688969000	43.69	93.14	454029	8200518	18.0617	58587	257834	0.0209
12-3	Hetao, Inner mongolia	12393795	2478759000	43.35	92.43	489432	9118253	18.6303	62227	267378	0.0226
12-4	Hetao, Inner mongolia	15286681	3057336200	42.22	92.45	433052	7496576	17.311	56620	249435	0.02
12-5	Hetao, Inner mongolia	11224692	2244938400	43.4	92.19	455219	8158888	17.923	58508	255114	0.021
13-1	Xiji,Ningxia	14117381	2823476200	42.87	92.48	479219	9001916	18.7846	60777	262484	0.0221
13-2	Xiji,Ningxia	12188014	2437602800	42.88	92.25	438371	7448882	16.9922	55775	242710	0.0202
13-3	Xiji,Ningxia	5893063	1178612600	44.47	92.77	261694	4933111	18.8507	57576	194320	0.0121
13-4	Xiji,Ningxia	9750023	1950004600	43.68	92.81	455687	6874595	15.0862	61509	278361	0.021
13-5	Xiji,Ningxia	11457509	2291501800	42.87	92.62	454252	7078102	15.5819	60490	272697	0.0209
14-1	Yinchuan,Ningxia	11324211	2264842200	42.98	92.13	465301	7658282	16.4588	60868	269741	0.0214
14-2	Yinchuan,Ningxia	10957089	2191417800	43.79	92.47	435136	6002337	13.7942	59068	269998	0.02
14-3	Yinchuan,Ningxia	10538651	2107730200	43.16	91.32	475214	7455894	15.6896	64131	289430	0.0219
14-4	Yinchuan,Ningxia	9769447	1953889400	43.53	91.78	475873	7332526	15.4086	63080	281871	0.0219
14-5	Yinchuan,Ningxia	11354598	2270919600	43.31	91.21	469213	6737402	14.3589	61228	268141	0.0216
15-1	Tongxin-2, Ningxia	9998966	1999793200	43.4	90.93	476655	7459611	15.6499	61887	272150	0.022
15-2	Tongxin-2, Ningxia	9721052	1944210400	43.28	91.58	498566	8298873	16.6455	66094	294326	0.023
15-3	Tongxin-2, Ningxia	10407744	2081548800	43	91.8	489426	7767348	15.8703	65092	291939	0.0226
15-4	Tongxin-2, Ningxia	9696894	1939378800	43.44	91.52	277791	4340685	15.6257	61981	203916	0.0128
15-5	Tongxin-2, Ningxia	5593272	1118654400	44.37	92.24	498138	8682211	17.4293	66508	297994	0.023
16-1	Wuwei,Gansu	10886045	2177209000	43.23	91.6	498333	9915363	19.8971	64431	283329	0.023
16-2	Wuwei,Gansu	12236131	2447226200	42.83	91.24	456753	9401626	20.5836	55962	236787	0.021
16-3	Wuwei,Gansu	9987730	1997546000	43.58	91.45	438090	8380768	19.1302	54203	230990	0.0202
16-4	Wuwei,Gansu	10854048	2170809600	43.26	91.64	458493	9114599	19.8795	56481	240570	0.0211
16-5	Wuwei,Gansu	12026198	2405239600	43.13	91.32	458217	9358955	20.4247	57259	248413	0.0211
17-1	Haiyuan,Ningxia	9903635	1980727000	43.24	91.37	485264	10475890	21.588	59996	253973	0.0224
17-2	Haiyuan,Ningxia	6804476	1360895200	45.33	92.16	471889	9082177	19.2464	57837	244937	0.0217
17-3	Haiyuan,Ningxia	9469740	1893948000	43.57	92.05	223227	8748124	39.1894	27365	132627	0.0103
17-4	Haiyuan,Ningxia	9627498	1925499600	43.47	92.32	220121	9028534	41.0162	27275	129660	0.0101
17-5	Haiyuan,Ningxia	9628548	1925709600	43.76	92.09	229980	4816919	20.9449	56663	187454	0.0106
18-1	Longde,Ningxia	10292490	2058498000	43.76	91.86	442569	8323277	18.8067	2149	17481	0.0204
18-2	Longde,Ningxia	8505667	1701133400	43.63	91.45	464326	8777597	18.904	56342	237224	0.0214
18-3	Longde,Ningxia	10231499	2046299800	43.35	92.25	478455	9746686	20.3712	59156	252244	0.022
18-4	Longde,Ningxia	10096078	2019215600	43.45	91.66	459844	9462956	20.5786	55580	230241	0.0212
18-5	Longde,Ningxia	9152228	1830445600	42.93	92.12	475481	9312661	19.5858	58493	248690	0.0219
19-1	Zizhou,Shaanxi	10146753	2029350600	43.05	91.7	209872	7327735	34.9153	24858	113127	0.0097
19-2	Zizhou,Shaanxi	11387070	2277414000	43.15	91.88	209007	10353572	49.537	25961	123054	0.0096
19-3	Zizhou,Shaanxi	10730436	2146087200	43.18	92.02	205430	7392626	35.9861	24304	115261	0.0095
19-4	Zizhou,Shaanxi	6044693	1208938600	44.31	92.73	256982	6494558	25.2724	60097	194918	0.0118
19-5	Zizhou,Shaanxi	11498120	2299624000	43.08	91.93	457906	9559369	20.8763	56035	235405	0.0211
20-1	Tacheng,Tibet	12023163	2404632600	43.15	91.54	462433	10581952	22.8832	56409	236735	0.0213
20-2	Tacheng,Tibet	13446598	2689319600	42.7	91.28	468041	10699240	22.8596	57673	241683	0.0216
20-3	Tacheng,Tibet	12300500	2460100000	42.39	91.51	471568	10081032	21.3777	58129	246804	0.0217
20-4	Tacheng,Tibet	10831244	2166248800	42.19	92.21	221531	10829357	48.8842	27180	127227	0.0102
20-5	Tacheng,Tibet	11859686	2371937200	42.68	92.03	209962	11575232	55.1301	26683	127425	0.0097
21-1	Yumin, Tibet	12411264	2482252800	42.65	91.3	216139	10259070	47.4651	26791	129292	0.01
21-2	Yumin, Tibet	13665086	2733017200	42.28	91.95	264822	7563121	28.5593	60541	196454	0.0122
21-3	Yumin, Tibet	11921866	2384373200	42.07	91.74	472375	9015032	19.0845	3169	20339	0.0218
22-1	Jingbian,Shaanxi	12287803	2457560600	42.26	91.25	469336	11281882	24.038	57388	239881	0.0216
22-2	Jingbian,Shaanxi	12383173	2476634600	42.34	91.6	451513	12107076	26.8145	61177	264561	0.0208
22-3	Jingbian,Shaanxi	15271196	3054239200	41.58	90.89	365761	6670316	18.2368	51141	230876	0.0169
23-1	Baiyin,Gansu	7084010	1416802000	43.08	90.25	444814	9282719	20.8688	58658	255997	0.0205
23-2	Baiyin,Gansu	12912249	2582449800	42.69	91.54	406366	6848257	16.8524	56714	258879	0.0187
23-3	Baiyin,Gansu	11627649	2325529800	42.09	91.45	463534	9576521	20.6598	57858	239985	0.0214
24-1	A.cea L. accessions (Red)	12752721	2550544200	42.13	91.99	502040	12428444	24.7559	69623	311293	0.0231
24-2	A.cea L. accessions (Red)	12410360	2482072000	41.72	91.67	457723	9392523	20.5201	58585	247370	0.0211
24-3	A.cea L. accessions (Red)	12383243	2476648600	42.43	91.31	432780	8376069	19.3541	56286	243424	0.0199
25-1	A.cea L. accessions (White)	10257150	2051430000	41.92	90.99	464125	10491550	22.605	60583	261623	0.0214
25-2	A.cea L. accessions (White)	14793519	2958703800	41.94	89.91	451847	10712366	23.7079	57751	246051	0.0208
25-3	A.cea L. accessions (White)	10695169	2139033800	42.49	90.05	461983	11015811	23.8446	59156	249517	0.0213
26-1	A.cea L. accessions (Yellow)	8979350	1795870000	42.56	91.25	406901	8516570	20.9303	56542	254479	0.0187
26-2	A.cea L. accessions (Yellow)	11739412	2347882400	43.05	90.73	434284	10968280	25.256	58109	256366	0.02
26-3	A.cea L. accessions (Yellow)	12650093	2530018600	41.78	91.48	439482	10620744	24.1665	58385	255120	0.0202
27-1	A.var.gigantum	14005494	2801098800	42.02	91.14	458353	10023961	21.8695	60130	262714	0.0211
27-2	A.var.gigantum	14315880	2863176000	41.62	91.02	418435	9833978	23.5018	59065	267895	0.0193
27-3	A.var.gigantum	13663919	2732783800	41.67	90.8	299898	8279938	27.6092	64228	216426	0.0138
28-1	A.mongolicum Regel	15472872	3094574400	41.63	90.5	475353	11907913	25.0507	62629	271419	0.0219
28-2	'A.mongolicum Regel	15982415	3196483000	41.79	91.05	443752	7767740	17.5047	56672	239253	0.0204
28-3	A.mongolicum Regel	14662932	2932586400	42.1	90.3	403831	7241597	17.9322	49788	208352	0.0186
